# Supplementary material
Source: Springer Nature journal article supplement (https://www.springermedizin.de/resource/supplementary/13231_2011_42_MOESM2_ESM.pdf/9676394)

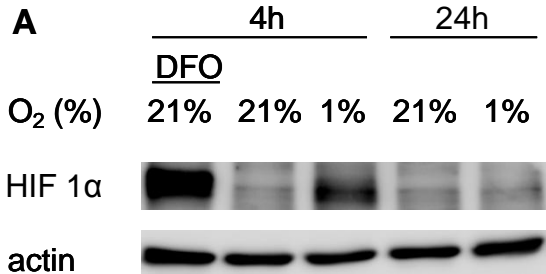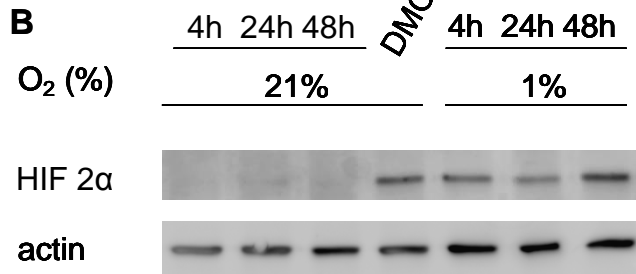

Supplement: MOESM2 [file 9676394]
